# Supplementary material for: Stated preferences for family doctor contract services: a survey of the rural elderly in Anhui Province, China
Source: HighWire-hosted journal article supplement (doi:10.1136/bmjopen-2021-053277), 2022-03-01
Supplement: bmjopen-2021-053277supp001_data_supplement.pdf [file bmjopen-2021-053277supp001_data_supplement.pdf]

**Supplemental materials:****eTable 1 The detailed explanation of attributes and levels****eTable 2 The content of family doctor contract service package****eTable 3 Covariates in the membership function****eTable 4 Preference estimates based on the conditional logit model****eTable 5 Average marginal effects of covariates on class memberships****Final questionnaire (the translated version)**

**eTable 1 The detailed explanation of attributes and levels**

| Attributes                         | Explanations                                                                                                                                                                                                                                                                                                                                                                                                                            |
|------------------------------------|-----------------------------------------------------------------------------------------------------------------------------------------------------------------------------------------------------------------------------------------------------------------------------------------------------------------------------------------------------------------------------------------------------------------------------------------|
| Service type                       | Medical services type provided by the family doctor to the elderly, including 2 levels:<br>1= Clinic visit<br>2= Home visit                                                                                                                                                                                                                                                                                                             |
| Service package                    | Medical services were provided by family doctor such as diagnosis and treatment of common and frequently-occurring diseases, as well as treatment of chronic diseases and traditional Chinese medicine (TCM) with a definite diagnosis, including 4 levels:<br>1= Basic service<br>2= Basic service +Chronic diseases service<br>3= Basic service +Traditional Chinese medicine (TCM) service<br>4= Basic service +Personalized service |
| Physician's reputation             | The residents' evaluation of the quality of physicians. More specifically, this attribute describes different levels of medical training experience and expertise, service attitude and care quality from the family doctor team, including 3 levels:<br>1= Relatively Good<br>2= Average<br>3= Relatively Poor                                                                                                                         |
| Annual contract costs <sup>a</sup> | Annual contract costs is the contracted fees per year paid by the contracted residents out-of-pocket to the family doctor team. The levels of contract cost attribute were determined according to actual cost standard in rural Anhui, including 4 levels:<br>1= CNY 20 ( US\$3)<br>2= CNY 40( US\$6)<br>3= CNY 60 ( US\$9)<br>4= CNY 80 ( US\$12)                                                                                     |

<sup>a</sup>: The average annual exchange rate between USD and CNY in 2019 was: USD 1 = CNY 6.908(Organisation for Economic Co-operation and Development data. Available online: <https://data.oecd.org/conversion/exchange-rates.htm>. Accessed March 30, 2021)

**eTable 2 The content of family doctor service package**

| Service package                                                    | Content                                                                                                                                                                                                                                                                                                                                                                                                                                                                                                                                                                                                                                                                                                                                                                                                                                                                                                                                                                                                                                                                                            |                            |
|--------------------------------------------------------------------|----------------------------------------------------------------------------------------------------------------------------------------------------------------------------------------------------------------------------------------------------------------------------------------------------------------------------------------------------------------------------------------------------------------------------------------------------------------------------------------------------------------------------------------------------------------------------------------------------------------------------------------------------------------------------------------------------------------------------------------------------------------------------------------------------------------------------------------------------------------------------------------------------------------------------------------------------------------------------------------------------------------------------------------------------------------------------------------------------|----------------------------|
| Basic service                                                      | <p><b>Basic health service:</b></p> <ul style="list-style-type: none"> <li>• The treatment of common and frequent occurring diseases, nursing care, and the treatment of chronic diseases with a clear diagnosis</li> <li>• First aid care</li> <li>• Home medical and referral services such as home visits, home nursing, home beds, etc.</li> <li>• Rehabilitation medical services</li> <li>• Traditional Chinese medicine services</li> </ul> <p><b>Public health service:</b></p> <ul style="list-style-type: none"> <li>• Resident health records, health guidance, health education</li> <li>• One physical exam per year for people over 65 years old</li> <li>• Follow up guidance and one physical examination for patients with severe mental illness</li> </ul>                                                                                                                                                                                                                                                                                                                       |                            |
| Basic service<br>+Chronic diseases<br>service                      | <p>Physical exam (height, weight, vision, blood pressure, body temperature, electrocardiogram, color doppler ultrasound (limited to one site), blood glucose/blood lipid, liver and kidney function, hematuria routine)</p> <p>Whole-course standardized services (mainly for patients with chronic diseases such as hypertension and diabetes)</p> <p>Long-term prescription service (continuation of the prescription and medication service of the higher level hospital)</p> <p>One time expert diagnosis and treatment per year</p>                                                                                                                                                                                                                                                                                                                                                                                                                                                                                                                                                           |                            |
| Basic service<br>+Traditional Chinese<br>medicine (TCM)<br>service | <p>Annual cupping therapy</p> <p>Annual treatment of winter diseases in summer</p> <p>Annual fumigation</p> <p>Annual cervical, shoulder, and lumbar traction</p> <p>Annual physical therapy</p>                                                                                                                                                                                                                                                                                                                                                                                                                                                                                                                                                                                                                                                                                                                                                                                                                                                                                                   | A maximum of three choices |
| Basic service<br>+Personalized service                             | <p>According to their own health needs, residents are free to choose the combination of chronic disease services offered and TCM services offered, with a maximum of three choices. Examples of combinations include:</p> <ul style="list-style-type: none"> <li>• Annual diagnosis and treatment of chronic disease by expert + Annual TCM cupping + Annual TCM fumigation</li> <li>• Annual diagnosis and treatment of chronic disease by expert + Annual TCM treatment of winter diseases in summer</li> <li>• Annual physical examination of chronic diseases + Annual TCM fumigation</li> <li>• Long-term prescription of chronic disease + Annual TCM cupping + Annual TCM cervical, shoulder, and lumbar traction</li> <li>• Whole-course standardized services of chronic disease + Annual TCM cervical, shoulder, and lumbar traction + Annual TCM physical therapy</li> <li>• Annual diagnosis and treatment of chronic disease by expert + Annual TCM cupping + Annual TCM physical therapy</li> <li>• Annual chronic disease long-term prescription + Annual TCM fumigation</li> </ul> |                            |

**eTable 3 Covariates in the membership function**

| Variables                               | Variable assignment                                   |
|-----------------------------------------|-------------------------------------------------------|
| Age                                     | 0= $\leq 65$ *<br>1= $> 65$                           |
| Gender                                  | 0= Male*<br>1= Female                                 |
| Education                               | 0= No school education*<br>1= Primary school or above |
| Self-reported health statu <sup>a</sup> | 0= Unhealthy*<br>1= Healthy                           |
| Number of chronic diseases              | 0= $\leq 1$ *<br>1= $\geq 2$                          |

<sup>a</sup>: Self- reported health statu is the physical health status of the respondents on the day of the survey. Likert scale was used to measure their physical health status. 1-5 is very unhealthy, unhealthy, moderately healthy, healthy, and very healthy respectively. Unhealth includes very unhealthy and unhealthy, healthy includes moderately healthy, healthy, and very healthy.

\*: reference

**eTable 4 Preference estimates based on the conditional logit model**

|                        |                                                      | Est       | SE         |
|------------------------|------------------------------------------------------|-----------|------------|
| ASC1                   |                                                      | 2.378***  | 0.185      |
| ASC2                   |                                                      | 2.254***  | 0.178      |
| Service type           | Clinic visit <sup>a</sup>                            |           |            |
|                        | Home visit                                           | 0.608***  | 0.060      |
| Service package        | Basic service <sup>a</sup>                           |           |            |
|                        | Basic service + Chronic disease service              | 1.105***  | 0.076      |
|                        | Basic service + Traditional Chinese medicine service | 0.463***  | 0.086      |
|                        | Basic service + Personalized service                 | 0.559***  | 0.104      |
| Physician's reputation | Relatively poor <sup>a</sup>                         |           |            |
|                        | Average                                              | 0.376**   | 0.164      |
|                        | Relatively good                                      | 1.609***  | 0.151      |
| Annual contract costs  |                                                      | -0.026*** | 0.002      |
| Number of observations |                                                      |           | 9810       |
| Log pseudolikelihood   |                                                      |           | -2656.7801 |

ASC: Alternative specific constant; Est: Estimate; SE: Standard error

\*\*\* p<0.01; \*\* p<0.05; \* p<0.1

<sup>a</sup>: reference

**eTable 5 Class membership: average marginal effects**

|                                      | Class1    |       | Class2    |       |
|--------------------------------------|-----------|-------|-----------|-------|
|                                      | Est       | SE    | Est       | SE    |
| Age: >65                             | 0.035***  | 0.009 | -0.035*** | 0.009 |
| Gender: Female                       | -0.030*** | 0.008 | 0.030***  | 0.008 |
| Education: Primary school or above   | -0.100*** | 0.007 | 0.100***  | 0.007 |
| Self-reported health statu: Healthy  | 0.028***  | 0.009 | -0.028*** | 0.009 |
| Number of chronic diseases: $\geq 2$ | -0.031*** | 0.009 | 0.031***  | 0.009 |

Est: Estimate; SE: Standard error

Reference: Age $\leq 65$ ; Gender=male; Education=no school education; Self-reported health statu=unhealth; Number of chronic diseases $\leq 1$

\*\*\* p<0.01;\*\* p<0.05;\* p<0.1

## Questionnaire

Dear residents:

In order to improve the quality and efficiency of family doctor contract services, and to understand the elderly residents' choices for the use of family doctor contract services, this study hopes to generate knowledge regarding your service needs. Each of your choices is very important. We ensure that your answers are kept confidential. Thank you very much for your cooperation!

If you are willing to help us complete the question and answer, please sign your name! Thank you very much!

### 一、 Demographic characteristics

1. Gender: ①Male; ②Female

2. Date of birth: \_\_\_\_\_ Year \_\_\_\_\_ Month

3. Education:

①No school education; ②Primary school; ③Junior high school; ④High school/ technical secondary school; ⑤ College; ⑥Bachelor degree and above

4. Your marital status:

①Unmarried; ②Married; ③Widowed; ④Divorced; ⑤Other

5. Who do you live with now?

①Living alone; ②Living with spouse; ③Living with children; ④Living with spouse and children; ⑤Other

6. What is your main source of income?

①Labor income; ②Retirement pension; ③Minimum living allowance; ④Support by relatives; ⑤Property income (renting/selling a house/land, etc.); ⑥Others (career insurance, laid-off living expenses, retired living expenses, etc.)

7. In 2018, how much is your own economic income (including various sources) (excluding other family members)?

①<6500 CNY; ②6500-14999 CNY; ③15000-24999 CNY; ④25000-75000 CNY; ⑤>75000 CNY

8. In 2018, how much did you spend on medical treatment (personal payment) in total?

①<500 CNY; ②500-999 CNY; ③1000-1999 CNY; ④2000-4999 CNY; ⑤5000-9999 CNY; ⑥>10000 CNY

9. Have you participated in the following medical insurance? (Multiple choice)

①Not insured; ②Urban employees' basic medical insurance; ③Urban residents' basic medical insurance; ④New rural cooperative medical care; ⑤Medical insurance for urban and rural residents

10. Have you purchased commercial medical insurance?

①Yes; ②No

11. What is your evaluation of your health in the past year?

① Very unhealthy; ②Unhealthy; ③Moderately healthy; ④Healthy; ⑤Very healthy

12. If you give a score to your health status, from 0 to 100 (0 represents the worst status, 100 represents the best status), would you score your health status now? \_\_\_\_\_
13. Do you suffer from the following chronic diseases diagnosed by medical institutions at the county level and above (please mark × if not; multiple choices are allowed)?  
①Type 1 or 2 diabetes; ②High blood pressure; ③High blood lipids; ④Chronic hepatitis; ⑤Heart disease (coronary heart disease/angina pectoris, etc.); ⑥Malignant tumor, location; ⑦Chronic lung disease (tuberculosis, chronic obstructive pulmonary disease, etc.); ⑧Others
14. What do you think of the severity of your chronic disease?  
①Almost effect; ②Slight degree; ③Generally serious; ④Seriously; ⑤Very serious
15. How do you evaluate the effect of diagnosed chronic diseases on your life?  
① Almost impact; ②Slight impact; ③General impact; ④Comparative impact; ⑤Serious impact
16. Have you taken medicines on time and in quantity for a long period of time in the past year?  
①Yes; ②No

## 二、 Family doctor contract service knowledge and willingness to sign

### 1. How many minutes does it take from your home to the nearest village clinic?

- ① <15; ②15-30; ③>30

### 2. Are you willing to conduct the first diagnosis at a village clinic?

- ① Unwilling; ②It doesn't matter; ③Yes

### 3. What is the longest time (minutes) you are willing to wait for a clinic visit in the village?

- ① <5; ②5-10; ③11-20; ④21-30; ⑤>30

### 4. Have you ever had a referral experience from a village clinic to a higher-level institution?

- ① Yes; ②No

### 5. Are you satisfied with the services of village doctors?

- ① Very dissatisfied; ②Not satisfied; ③General; ④Satisfied; ⑤Very satisfied

### 6. Are you aware of Family Doctor Contract Services?

- ① Yes; ②No

### 7. Are you willing to sign a contract with a regular family doctor team? (Select "①" to jump to 10)

- ① Unwilling; ②Yes but worries; ③Yes

### 8. Have you signed up for Family Doctor Contract Services? (Choose "①" to continue to answer 9, choose "②" to skip to 10)

- ① Yes; ②No;

### 9. What is the main reason you signed the family doctor team?



①The community doctor is fixed and understands the patient's condition; ②Convenient service (short distance for treatment/short waiting time/easy to make an appointment); ③Low price and low cost; ④Good service attitude; ⑤Other, please specify

#### 10. What is the main reason for you not to sign a family doctor team?

① I don't understand the policy of Family Doctor Contract Services; ②Do not trust the family doctor who may delay the process of my recovery; ③Difficulty in referral; ④The level of diagnosis and treatment in village clinic is low; ⑤Medical equipment in the village clinic is out of date; ⑥Insufficient medicines are provided; ⑦Worry that the free choice of medical treatment will be affected after signing the contract; ⑧Others, please specify

### 三、 Preference measure

Suppose you now have two Family Doctor Contract Services plans to choose from, plan 1 and plan 2. There are differences between the two plans in terms of service type, service package, doctor's reputation, and annual contract costs. It is assumed that, except for the four attributes listed, the other conditions of plan 1 and plan 2 are the same. Please choose one plan that you prefer based on your personal preferences. Each of your choices will affect the formulation of policies related to family doctor contract service. Please consider your choices carefully.

#### ◇Warm -up choice set

| Attributes                                                                                                                                  | Plan1             | Plan 2          |
|---------------------------------------------------------------------------------------------------------------------------------------------|-------------------|-----------------|
| Service type                                                                                                                                | Home visit        | Clinic visit    |
| Service package                                                                                                                             | Basic service     | Basic service   |
| Physician's reputation                                                                                                                      | Average           | Relatively poor |
| Annual contract costs                                                                                                                       | CNY 80 ( US\$ 12) | CNY 40 (US\$ 6) |
| Which would you choose?                                                                                                                     | ( )               | ( )             |
| Now suppose you can also choose not to sign up with a family doctor, noting that your diseases would not get better, what would you prefer? |                   |                 |
| 1. I Would still prefer the plan I choose above ( )                                                                                         |                   |                 |
| 2. I Would choose neither ( )                                                                                                               |                   |                 |

#### 1. Choice set 1

| Attributes                                                                                                                                  | Plan1                                | Plan 2                                                     |
|---------------------------------------------------------------------------------------------------------------------------------------------|--------------------------------------|------------------------------------------------------------|
| Service type                                                                                                                                | Clinic visit                         | Clinic visit                                               |
| Service package                                                                                                                             | Basic service + Personalized service | Basic service + Traditional Chinese medicine (TCM) service |
| Physician's reputation                                                                                                                      | Relatively poor                      | Relatively poor                                            |
| Annual contract costs                                                                                                                       | CNY 20 (US\$ 3)                      | CNY 40 (US\$ 6)                                            |
| Which would you choose?                                                                                                                     | ( )                                  | ( )                                                        |
| Now suppose you can also choose not to sign up with a family doctor, noting that your diseases would not get better, what would you prefer? |                                      |                                                            |
| 1. I Would still prefer the plan I choose above ( )                                                                                         |                                      |                                                            |
| 2. I Would choose neither ( )                                                                                                               |                                      |                                                            |

## 2. Choice set 2

| Attributes                                                                                                                                         | Plan1            | Plan 2                                  |
|----------------------------------------------------------------------------------------------------------------------------------------------------|------------------|-----------------------------------------|
| Service type                                                                                                                                       | Home visit       | Clinic visit                            |
| Service package                                                                                                                                    | Basic service    | Basic service + Chronic disease service |
| Physician's reputation                                                                                                                             | Relatively poor  | Relatively poor                         |
| Annual contract costs                                                                                                                              | CNY 80 (US\$ 12) | CNY 80 (US\$ 12)                        |
| Which would you choose?                                                                                                                            | ( )              | ( )                                     |
| <b>Now suppose you can also choose not to sign up with a family doctor, noting that your diseases would not get better, what would you prefer?</b> |                  |                                         |
| 1. I Would still prefer the plan I choose above ( )                                                                                                |                  |                                         |
| 2. I Would choose neither ( )                                                                                                                      |                  |                                         |

## 3. Choice set 3

| Attributes                                                                                                                                         | Plan1                                   | Plan 2                               |
|----------------------------------------------------------------------------------------------------------------------------------------------------|-----------------------------------------|--------------------------------------|
| Service type                                                                                                                                       | Home visit                              | Home visit                           |
| Service package                                                                                                                                    | Basic service + Chronic disease service | Basic service + Personalized service |
| Physician's reputation                                                                                                                             | Relatively good                         | Average                              |
| Annual contract costs                                                                                                                              | CNY 40 (US\$ 6)                         | CNY 80 (US\$ 12)                     |
| Which would you choose?                                                                                                                            | ( )                                     | ( )                                  |
| <b>Now suppose you can also choose not to sign up with a family doctor, noting that your diseases would not get better, what would you prefer?</b> |                                         |                                      |
| 1. I Would still prefer the plan I choose above ( )                                                                                                |                                         |                                      |
| 2. I Would choose neither ( )                                                                                                                      |                                         |                                      |

## 4. Choice set 4 (test choice set)

| Attributes                                                                                                                                         | Plan1           | Plan 2          |
|----------------------------------------------------------------------------------------------------------------------------------------------------|-----------------|-----------------|
| Service type                                                                                                                                       | Home visit      | Home visit      |
| Service package                                                                                                                                    | Basic service   | Basic service   |
| Physician's reputation                                                                                                                             | Relatively good | Relatively good |
| Annual contract costs                                                                                                                              | CNY 40 (US\$ 6) | CNY 80(US\$ 12) |
| Which would you choose?                                                                                                                            | ( )             | ( )             |
| <b>Now suppose you can also choose not to sign up with a family doctor, noting that your diseases would not get better, what would you prefer?</b> |                 |                 |
| 1. I Would still prefer the plan I choose above ( )                                                                                                |                 |                 |
| 2. I Would choose neither ( )                                                                                                                      |                 |                 |

## 5. Choice set 5

| Attributes   | Plan1        | Plan 2     |
|--------------|--------------|------------|
| Service type | Clinic visit | Home visit |

|                                                                                                                                                    |                                      |                                      |
|----------------------------------------------------------------------------------------------------------------------------------------------------|--------------------------------------|--------------------------------------|
| <b>Service package</b>                                                                                                                             | Basic service + Personalized service | Basic service + Personalized service |
| <b>Physician's reputation</b>                                                                                                                      | Average                              | Relatively good                      |
| <b>Annual contract costs</b>                                                                                                                       | CNY 60 (US\$ 9)                      | CNY 60 (US\$ 9)                      |
| <b>Which would you choose?</b>                                                                                                                     | ( )                                  | ( )                                  |
| <b>Now suppose you can also choose not to sign up with a family doctor, noting that your diseases would not get better, what would you prefer?</b> |                                      |                                      |
| <b>1. I Would still prefer the plan I choose above ( )</b>                                                                                         |                                      |                                      |
| <b>2. I Would choose neither ( )</b>                                                                                                               |                                      |                                      |

## 6. Choice set 6

| Attributes                                                                                                                                         | Plan1                                                      | Plan 2                                                     |
|----------------------------------------------------------------------------------------------------------------------------------------------------|------------------------------------------------------------|------------------------------------------------------------|
| <b>Service type</b>                                                                                                                                | Clinic visit                                               | Home visit                                                 |
| <b>Service package</b>                                                                                                                             | Basic service + Traditional Chinese medicine (TCM) service | Basic service + Traditional Chinese medicine (TCM) service |
| <b>Physician's reputation</b>                                                                                                                      | Relatively good                                            | Average                                                    |
| <b>Annual contract costs</b>                                                                                                                       | CNY 80 (US\$ 12)                                           | CNY 20 (US\$ 3)                                            |
| <b>Which would you choose?</b>                                                                                                                     | ( )                                                        | ( )                                                        |
| <b>Now suppose you can also choose not to sign up with a family doctor, noting that your diseases would not get better, what would you prefer?</b> |                                                            |                                                            |
| <b>1. I Would still prefer the plan I choose above ( )</b>                                                                                         |                                                            |                                                            |
| <b>2. I Would choose neither ( )</b>                                                                                                               |                                                            |                                                            |

## 7. Choice set 7

| Attributes                                                                                                                                         | Plan1                                                      | Plan 2          |
|----------------------------------------------------------------------------------------------------------------------------------------------------|------------------------------------------------------------|-----------------|
| <b>Service type</b>                                                                                                                                | Home visit                                                 | Clinic visit    |
| <b>Service package</b>                                                                                                                             | Basic service + Traditional Chinese medicine (TCM) service | Basic service   |
| <b>Physician's reputation</b>                                                                                                                      | Average                                                    | Relatively good |
| <b>Annual contract costs</b>                                                                                                                       | CNY 60 (US\$ 9)                                            | CNY 60 (US\$ 9) |
| <b>Which would you choose?</b>                                                                                                                     | ( )                                                        | ( )             |
| <b>Now suppose you can also choose not to sign up with a family doctor, noting that your diseases would not get better, what would you prefer?</b> |                                                            |                 |
| <b>1. I Would still prefer the plan I choose above ( )</b>                                                                                         |                                                            |                 |
| <b>2. I Would choose neither ( )</b>                                                                                                               |                                                            |                 |

8. You have completed all the choice tasks, are you clear about the decision making process? (If you choose ①/②, skip to 10)

① Very unclear; ②Unclear; ③General; ④Clear; ⑤Very clear

9. Do you find these choice tasks difficult? (If you choose ①/② to continue to answer 10, choose ③/④/⑤ to skip to 11)

①Very difficult; ②Difficult; ③General; ④Easy; ⑤Very easy

10. Why do you feel that the selection process is unclear/difficult? \_\_\_\_\_.

11. Which of the following criteria did you choose when you made your choice?

①Look at each option carefully; ②Look only at the most important option for me, please explain \_\_\_\_\_; ③  
The options you care about are different each time; ④Others, please specify \_\_\_\_\_.

12. Please rate the four attributes in the plan according to their importance (tick  $\checkmark$  in the corresponding box)

| Attribute             | Very unimportant | Unimportant | General | Important | Very Important |
|-----------------------|------------------|-------------|---------|-----------|----------------|
| Service type          |                  |             |         |           |                |
| Service package       |                  |             |         |           |                |
| Doctor's reputation   |                  |             |         |           |                |
| Annual contract costs |                  |             |         |           |                |

13. Is the survey subject certain when making the choices? (Filled by investigator)

① Very uncertain; ②Uncertain; ③Neither; ④Certain; ⑤Very certain

Thank you again for participating in our survey!

Interviewer: \_\_\_\_\_ Survey date: \_\_\_\_ year \_\_\_\_ month \_\_\_\_ day

Quality control officer: \_\_\_\_\_ Audit date: \_\_\_\_ year \_\_\_\_ month \_\_\_\_ day
